# Supplementary material
Source: Springer Nature journal article supplement (https://www.springermedizin.de/resource/supplementary/12876_2006_185_MOESM2_ESM.pdf/9438876)

## A. Stomach cancer (non-cardia)

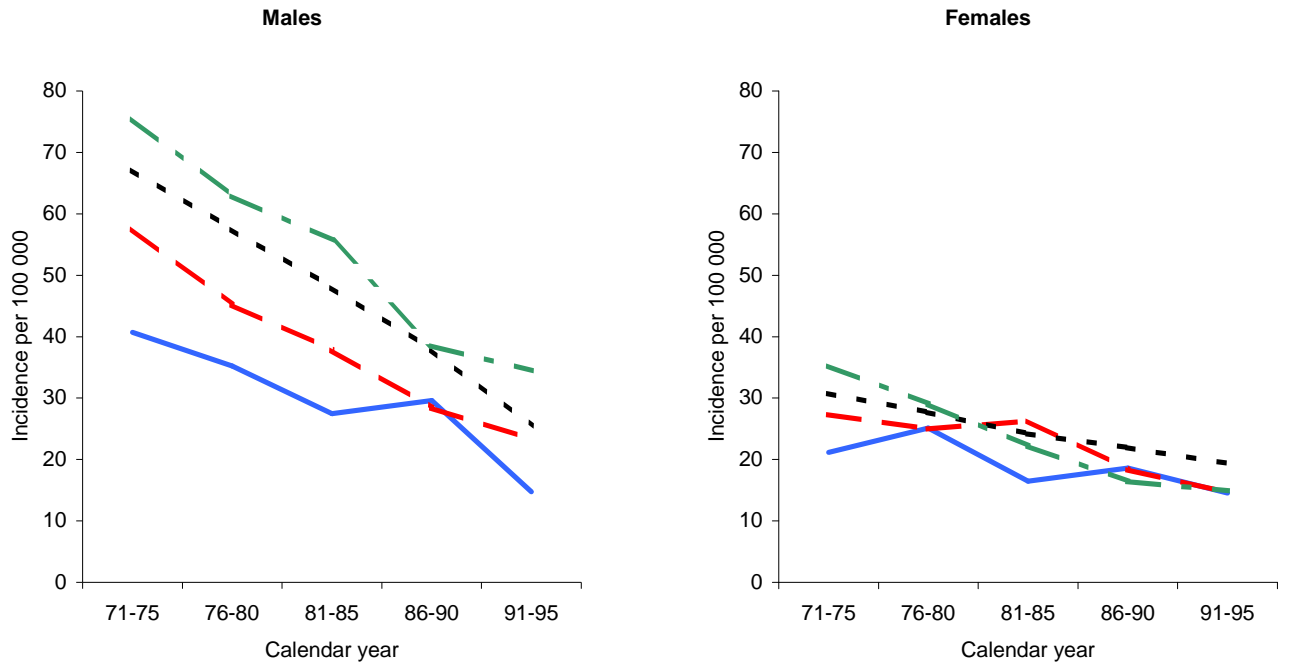

## B. Cardia cancer

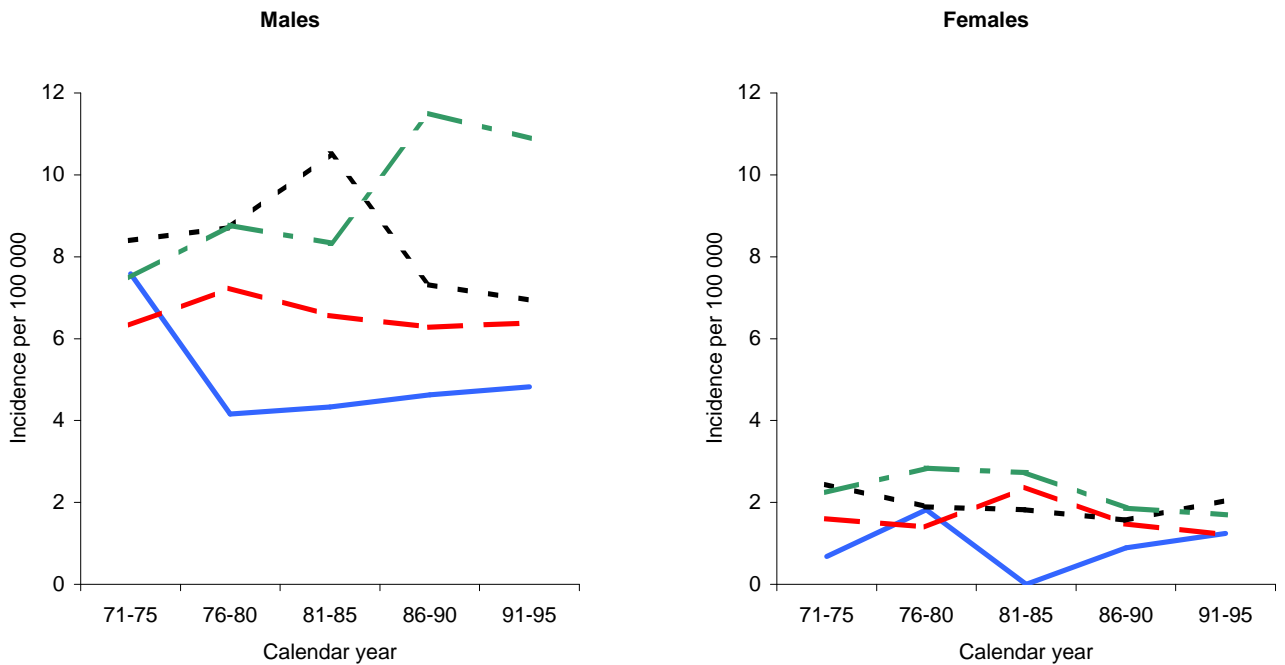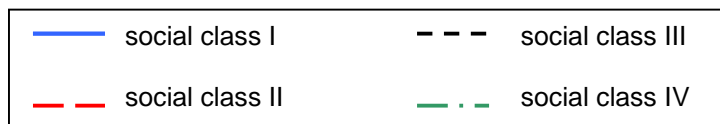

Supplement: MOESM2 [file 9438876]
